# Supplementary material
Source: PubMed Central journal article supplement (PMC4512906)
Supplement: NIHMS692019-supplement-Supplemental_Material.pdf [file NIHMS692019-supplement-Supplemental_Material.pdf]

## SUPPLEMENTAL MATERIAL

**Supplemental Table 1. Factors Associated with NOAC Use (vs. Warfarin Use):**

**Multivariable GEE Analysis Using Multiple Imputation Strategy for Missing Variables**

| Variable                                          | Odds<br>Ratio | Lower<br>Limit of<br>95% CI | Upper<br>Limit of<br>95% CI | p-value |
|---------------------------------------------------|---------------|-----------------------------|-----------------------------|---------|
| Age (per 10 year increase)                        | 0.93          | 0.91                        | 0.96                        | <0.001  |
| Sex (female vs. male)                             | 0.93          | 0.89                        | 0.98                        | 0.012   |
| Race (white vs. other)                            | 1.27          | 1.17                        | 1.39                        | <0.001  |
| Insurance status (vs. other)                      |               |                             |                             | <0.001  |
| Medicaid                                          | 0.84          | 0.74                        | 0.96                        |         |
| Medicare                                          | 0.91          | 0.85                        | 0.98                        |         |
| No insurance                                      | 0.42          | 0.34                        | 0.53                        |         |
| Medical history                                   |               |                             |                             |         |
| Previous stroke/TIA                               | 1.12          | 1.05                        | 1.19                        | <0.001  |
| Stroke type (ischemic stroke vs. other)           | 0.89          | 0.83                        | 0.96                        | 0.001   |
| Heart failure                                     | 0.90          | 0.84                        | 0.98                        | 0.009   |
| Dyslipidemia                                      | 1.06          | 1.00                        | 1.11                        | 0.036   |
| Prosthetic heart valve                            | 0.38          | 0.31                        | 0.48                        | <0.001  |
| Smoking                                           | 0.85          | 0.77                        | 0.94                        | 0.001   |
| Anticoagulant therapy prior to admission          | 0.52          | 0.49                        | 0.55                        | <0.001  |
| Serum creatinine (per 1mg/dL unit increase)       | 0.77          | 0.73                        | 0.81                        | <0.001  |
| Systolic BP (per 10mmHg unit increase)            | 1.01          | 1.00                        | 1.02                        | 0.009   |
| Discharge medications                             |               |                             |                             |         |
| Aspirin                                           | 0.71          | 0.67                        | 0.76                        | <0.001  |
| Clopidogrel                                       | 0.73          | 0.65                        | 0.83                        | <0.001  |
| Discharge to home (vs. other)                     | 1.48          | 1.39                        | 1.58                        | <0.001  |
| Ambulatory status (vs. ambulate<br>independently) |               |                             |                             | <0.001  |

|                                   |      |      |      |        |
|-----------------------------------|------|------|------|--------|
| Unable to ambulate                | 0.63 | 0.56 | 0.71 |        |
| Ambulate with assistance          | 0.91 | 0.84 | 0.98 |        |
| Region (vs. Northeast)            |      |      |      | <0.001 |
| Midwest                           | 1.09 | 0.94 | 1.28 |        |
| South                             | 1.37 | 1.20 | 1.56 |        |
| West                              | 0.93 | 0.79 | 1.10 |        |
| Number of beds (per 100 increase) | 1.00 | 1.00 | 1.00 | 0.028  |

---

CI indicates confidence interval; GEE, generalized estimating equations; All other abbreviations can be found in Tables 1 and 2; n=61,408
